1 Granzyme B is an essential mediator in CD8+ T cell killing of *Theileria*  
2 *parva*-infected cells.  
3

4 Jie Yang<sup>1,2</sup>, Alan Pemberton<sup>1</sup>, W. Ivan Morrison<sup>1</sup> and Tim Connelley<sup>1</sup>  
5  
6

7 <sup>1</sup> The Roslin Institute, Royal (Dick) School of Veterinary Studies, University of  
8 Edinburgh, UK

9 <sup>2</sup> Current address: Institute of Immunity and Transplantation, Division of Infection  
10 and Immunity, University College London, Royal Free Hospital, London, UK  
11  
12

13 Corresponding author: Professor W Ivan Morrison – [ivan.morrison@roslin.ed.ac.uk](mailto:ivan.morrison@roslin.ed.ac.uk)

14 Tel – 44 (0)131 651 9247  
15  
16  
17  
18  
19  
20  
21

## 22 **Abstract**

23 There is established evidence that cytotoxic CD8+ T cells are important mediators of  
24 immunity against the bovine intracellular protozoan parasite *T. parva*. However, the  
25 mechanism by which the specific CD8+ T cells kill parasitized cells is not  
26 understood. Although the predominant pathway used by human and murine CD8+ T  
27 cells to kill pathogen-infected cells is granule exocytosis, involving release of perforin  
28 and granzyme B, there is to date a lack of published information on the biological  
29 activities of bovine granzyme B. The present study set out to define the functional  
30 activities of bovine granzyme B and determine its role in mediating killing of *T. parva*-  
31 parasitized cells. DNA constructs encoding functional and non-functional forms of  
32 bovine granzyme B were produced and the proteins expressed in Cos-7 cells were  
33 used to establish an enzymatic assay to detect and quantify expression of functional  
34 granzyme B protein. Using this assay, the levels of killing of different *T. parva*-  
35 specific CD8+ T cell clones were found to be significantly correlated with levels of  
36 granzyme B protein, but not mRNA transcript, expression. Experiments using  
37 inhibitors specific for perforin and granzyme B confirmed that CD8+ T cell killing of  
38 parasitized cells is dependent on granule exocytosis and specifically granzyme B.  
39 Further studies showed that granzyme B-mediated death of parasitized cells is  
40 independent of caspases, but involves activation of the pro-apoptotic molecule Bid.

41

## 42 **Keywords**

43 Granzyme B, CD8+ T cell, cattle, cytotoxicity, *Theileria parva*, substrate specificity

44

45

## 46 Introduction

47 Antigen-specific CD8<sup>+</sup> T cell responses have been shown to play a key role in  
48 immunity to a number of viral, bacterial and parasitic infections. One such parasite is  
49 the tick-borne protozoan *Theileria parva*. *T. parva* infects and transforms bovine  
50 lymphocytes resulting in an acute, often fatal, lymphoproliferative disease, which is a  
51 major constraint to cattle production in a large part of eastern and southern Africa  
52 (1). Following invasion of host lymphocytes, the parasite enters the cytosol where it  
53 develops to the schizont stage, which triggers a number of signalling pathways that  
54 promote host cell proliferation and inhibit apoptosis. By associating with the mitotic  
55 spindle of the activated lymphocyte, the parasite is able to divide at the same time as  
56 the host cell, ensuring that infection is retained in both daughter cells. Hence, the  
57 parasite remains in an intracellular location during this stage of development. Cattle  
58 that recover from infection with *T. parva* are solidly immune to subsequent challenge  
59 with the same parasite strain but show variable susceptibility to other parasite strains  
60 (2). Development of immunity is associated with a potent parasite-specific CD8<sup>+</sup> T  
61 cell response directed against the parasitized lymphoblasts (3, 4), and transfer of  
62 purified CD8<sup>+</sup> T cells from immune to naïve twin calves has been shown to confer  
63 immunity to parasite challenge (5). The mechanism by which CD8<sup>+</sup> T cells mediate  
64 protection against *T. parva* is poorly understood. They exhibit strong MHC-restricted  
65 cytotoxic activity and secrete IFN $\gamma$  and TNF $\alpha$ ; however, unlike other intracellular  
66 protozoa (6, 7), these cytokines do not appear to have a direct effector role against  
67 the parasite (8). Hence, cytotoxicity is considered likely to have an important role in  
68 immunity, although direct evidence for this is lacking.

69 As an initial step towards investigating development of subunit vaccines, *T. parva*-  
70 specific CD8<sup>+</sup> T cell lines have been used successfully to identify a number of target

71 antigens, employing high-throughput screens of expressed parasite cDNAs.  
72 Although prime-boost immunisation of cattle with recombinant poxviruses expressing  
73 some of these antigens was found to generate specific CD8<sup>+</sup> T cell responses, the  
74 immunised animals exhibited only partial protection against parasite challenge. A  
75 striking feature of the CD8<sup>+</sup> T cells induced by this immunisation protocol is that they  
76 showed poor cytotoxic activity compared to CD8<sup>+</sup> T cells generated by immunisation  
77 with live parasites, suggesting poor functional differentiation of the T cell response  
78 (9).

79 Killing of target cells by CD8<sup>+</sup> T cells is achieved by release of the contents of  
80 secretory lysosomes, known as lytic granules, at the immunological synapse formed  
81 upon recognition of class I MHC-bound antigenic peptides by the T cell receptor. Cell  
82 killing is initiated by perforin, which creates transient pores in the membrane of the  
83 target cell, facilitating uptake into the cytosol of a family of serine proteases known  
84 as granzymes. Granzymes exhibit different primary substrate specificities and are  
85 able to act on various cellular protein substrates to trigger programmed cell death  
86 (10). Five granzymes (A, B, K, H and M) have been identified in humans; mice  
87 express four of these granzymes (A, B, K and M) and 6 additional granzymes (C, E,  
88 D, F, G and N) (11). We have recently shown that cattle express the same 5  
89 granzymes described in humans, plus a novel granzyme (designated granzyme O)  
90 (12). Granzymes have been classified into three distinct evolutionary groups, based  
91 on their primary substrate specificities, namely trypsin-like (granzymes A and K),  
92 chymotrypsin-like (granzymes B, H, C, E, M, D, F, G and N) and metase-like  
93 (granzyme M) (13). The most extensively studied of these proteases, granzyme B,  
94 cleaves aspartic acid residues. *In vitro* studies have demonstrated that granzyme B  
95 induces target cell death by two main pathways, one involving direct proteolytic

96 activation of caspases (leading to DNA damage) and the other by triggering outer  
97 mitochondrial membrane permeabilisation via cleavage of the pro-apoptotic protein,  
98 BH3-interaction domain death agonist (Bid) (14). The relative physiological roles of  
99 these activities *in vivo* remain unclear, particularly in view of the potential functional  
100 redundancy among the granzymes. Nevertheless, gene knockout mice deficient in  
101 granzyme B have been shown to have reduced levels of CD8+ T cell-mediated  
102 cytotoxicity and have increased susceptibility to some viral infections. Despite the  
103 residual ability of CD8+ T cells from granzyme B<sup>-/-</sup> mice to kill target cells, they were  
104 unable to induce DNA fragmentation (15). Extrapolation of findings in mice to other  
105 mammalian species is also complicated by the finding of differences in protein  
106 substrate specificity between murine and human granzyme B; in contrast to human  
107 granzyme B, mouse granzyme B is inefficient at cleaving Bid and is therefore  
108 believed to rely largely on direct activation of caspases (16).

109 In view of the potential importance of CD8+ T cell mediated cytotoxicity as an  
110 effector mechanism against *T. parva*, the current study set out to examine the  
111 biological activity of bovine granzyme B and to investigate its role in CD8+ T cell-  
112 mediated killing of *T. parva*-infected cells. The results demonstrate that granzyme B  
113 plays a key role in killing of parasitized cells, that it is able to cleave Bid and that  
114 killing occurs predominantly by a caspase-independent pathway.

115

## 116 **Results**

117 **Establishing an *in vitro* assay of granzyme B activity.** Bovine granzyme B cDNA  
118 incorporated into the pFLAG eukaryotic expression vector (Figure 1A) was  
119 expressed in Cos-7 cells and the expressed product tested for enzymatic activity

120 using a substrate assay employing AC-IEPD-pNA, which contains a tetrapeptide  
121 recognized specifically by human and murine granzyme B. As shown in Figure 1B,  
122 the active form of Granzyme B (pFLAG-Function - with the pro-dipeptide removed)  
123 displayed strong activity against the substrate, whereas the native form (pFLAG-WT)  
124 and a version containing a mutation in the active tri-peptide site (pFLAG-Mutant)  
125 were inactive. As a substrate-specific control, the chymotrypsin substrate Suc-GGF-  
126 pNA was used in the assay and no signal was detected with any of the cattle  
127 granzyme B constructs.

128 To confirm the specificity of the expressed granzyme B, the enzymatic activity was  
129 measured in the presence or absence of the granzyme B inhibitor AC-IEPD-CHO.  
130 The specific inhibitor dramatically reduced the activity of the cattle granzyme B  
131 preparation by about 4-fold, close to the background level (Figure 1C). The  
132 substantial loss of enzymatic function indicates an effective inhibitory capacity of AC-  
133 IEPD-CHO for cattle granzyme B.

134 **Relationship of cytotoxic activity and granzyme B transcript profiles.** Analysis  
135 of cDNA from *T. parva*-specific CD8<sup>+</sup> T cell lines by PCR employing primers that  
136 amplify transcripts for 6 defined bovine granzymes demonstrated expression of all  
137 six genes, including granzyme B (Figure 2A). The kinetics of granzyme B mRNA  
138 expression were examined using a semi-quantitative PCR to determine whether  
139 expression was strongly influenced by the time interval after antigenic stimulation.  
140 Examination of cDNA prepared from CD8<sup>+</sup> T cells at 2-3 day intervals, between 2  
141 and 14 days after stimulation with  $\gamma$ -irradiated *T. parva*-infected cells, demonstrated  
142 that near maximal levels of gene expression were achieved between 5 and 7 days  
143 after antigenic stimulation, with a subsequent decline in expression (Figure 2B and  
144 C). Cells harvested 6-7 days after antigenic stimulation were used for subsequent

145 experiments. To determine whether the levels of killing by CD8+ T cells are related  
146 to granzyme B and perforin mRNA expression, CD8+ T cell clones exhibiting  
147 different levels of killing were analysed using a semi-quantitative PCR. Two sets of  
148 cloned CD8+ T cell lines derived from different animals (641 and 011) were  
149 examined; each set of lines expressed identical TCR $\beta$  chains and recognised the  
150 same epitope but exhibited different levels of cytotoxic activity on autologous  
151 parasitized cells (Figure 2D). Of the 4 clones examined from animal 641, two  
152 showed no cytotoxic activity whereas the other 2 gave 28-33% killing of parasitized  
153 cells. Two of the T cell clones from animal 011 gave high levels of killing (65-75%) of  
154 parasitized target cells while the other two clones gave low levels of killing (<30%).  
155 Transcripts for granzyme B and perforin were detected in all 8 T cell clones (Figure  
156 2E). Overall, there was no consistent pattern of either granzyme B ( $r= 0.438$ ,  $p=$   
157  $0.278$ ) or perforin ( $r= -0.104$ ,  $p= 0.806$ ) mRNA transcript expression that correlated  
158 with killing activity (Figure 2F).

### 159 **Relationship of cytotoxic activity and level of granzyme B protein expression.**

160 A series of CD8+ T cell clones specific for the same epitope in the Tp1 *T. parva*  
161 antigen (Tp1<sub>214-224</sub>) were used to examine the relationship between killing activity  
162 and granzyme B protein expression. The CD8+ T cell clones showed levels of killing  
163 of *T. parva*-infected cells ranging from 1% to 47% at an effector to target ratio of 2:1  
164 (Figure 3A). Granzyme B activity in culture supernatants and in cell lysates of these  
165 clones following incubation with infected cells was measured using the *in vitro*  
166 substrate-specific assay established above. As shown in Figure 3A, the T cell clones  
167 showed variable levels of granzyme B release following exposure to antigen-  
168 expressing cells (which prior assays had confirmed do not express granzyme B  
169 protein, data not shown). The levels of granzyme activity in cell supernatants showed

170 a close correlation with the levels of granzyme protein in lysates of the respective  
171 clones ( $r= 0.953$ ,  $p< 0.0001$  – Figure 3B), indicating that the levels of enzyme  
172 release reflect the cell content rather than inherent differences in rates of release  
173 during degranulation. The levels of granzyme B content of the clones showed a  
174 statistically significant correlation ( $r=0.732$ ,  $p= 0.007$ ) with the levels of cytotoxicity of  
175 the T cell clones (Figure 3C).

176 **Cytotoxic activity of T cells is dependent on perforin and granzyme B.** The  
177 involvement of lytic granule exocytosis and specifically the role of granzyme B in cell  
178 killing by bovine CD8+ T cells were investigated by testing the effect of specific  
179 inhibitors of perforin and granzyme B. Cytotoxicity assays were first conducted in  
180 the presence of a range of concentrations of concanamycin A (CMA), an inhibitor of  
181 vacuolar type H<sup>+</sup>-ATPase (17), which raises the pH of the lytic granule and thus  
182 induces degradation of perforin (18). The effect of CMA on cytotoxic activity was  
183 examined using an un-cloned CD8+ T cell line assayed either on *T. parva*-infected or  
184 peptide-pulsed target cells, and 3 cloned CD8+ T cell lines assayed on infected  
185 target cells. Concentrations of 10ng/ml or greater of CMA were found to completely  
186 ablate killing of all T cell lines (Figure 4A and B). These concentrations of CMA did  
187 not affect the viability of the target cells (Figure 4A and B) or the CD8+ T cells (data  
188 not shown). The results indicate that lysis of *T. parva*-infected cells by CD8+ T cells  
189 is dependent on perforin, implying that killing is mediated by release of granule  
190 enzymes.

191 To examine the role of granzyme B in cell killing, several specific inhibitors used in  
192 studies of murine and human CD8+ T cells were first tested for their ability to inhibit  
193 granzyme B activity in bovine CD8+ T cell lysates tested using the *in vitro* substrate-  
194 specific assay. Although AC-IEPD-CHO was the most potent inhibitor, reducing



195 granzyme B activity by approximately 80% (Supplementary 1), it is not cell  
196 membrane-permeable, prohibiting its use in cellular assays. Z-IETD-FMK, which is  
197 membrane permeable and has been shown to inhibit killing of human CD8+ T cells  
198 (19, 20), inhibited bovine granzyme B activity by approximately 50% in the substrate  
199 assay (Supplementary 1), so was used in subsequent experiments. Pre-incubation of  
200 *T. parva*-specific CD8+ T cells with Z-IETD-FMK for one hour prior to use in a  
201 cytotoxicity assay resulted in complete inhibition of cytotoxic activity of all 3 cloned T  
202 cell lines tested (Figure 4C). A control compound Z-VAD-FMK (a caspase inhibitor  
203 that does not affect granzyme B activity of effector cells) did not affect cell killing.

204 In conclusion, these findings reveal that Z-IETD-FMK specifically and effectively  
205 blocks the activity of cattle granzyme B and inhibits killing of target cells by bovine  
206 CD8+ T cells - indicating that granzyme B is an important mediator for killing of *T.*  
207 *parva* infected cells.

208 **Cytotoxic activity of T cells is independent of caspases, but involves activation**

209 **of Bid.** To examine the role of caspases in cell killing, experiments were undertaken  
210 to test the ability of the pan-caspase inhibitor Z-VAD-FMK and its control Z-FA-FMK  
211 to block killing by two *T. parva*-specific CD8+ T cell clones. In contrast to previous  
212 experiments in which this inhibitor was pre-incubated with effector cells (as a  
213 negative control), these experiments involved pre-incubation with the target cells.  
214 Cytotoxic activity of the CD8+ T cell clones was blocked by inclusion of inhibitors of  
215 perforin and granzyme B (CMA and Z-IETD-FMK respectively) but was unaffected by  
216 pre-incubation with Z-VAD-FMK (Figure 5A), confirming that killing by these clones  
217 was granzyme B-dependent but demonstrating that it was independent of caspase  
218 activity. In contrast, Z-VAD-FMK specifically blocked lysis of *Theileria*-infected cells  
219 induced by the pro-apoptotic agent cisplatin (Supplementary 2), which is known to  
220 mediate cytotoxicity through caspase induction. These results therefore suggest that  
221 granzyme B-mediated killing of *Theileria*-infected cells by specific CD8+ T cells is  
222 largely independent of caspases.

223 The other mechanism by which granzyme B is known to induce cell death is through  
224 cleavage, and so activation, of the pro-apoptotic molecule Bid. To investigate this we  
225 sought to examine the ability of bovine granzyme B to cleave bovine Bid. Wild-type  
226 bovine Bid was expressed in *E.coli* BL21 with cDNA incorporated into the pET-15b  
227 expression vector, which carries an N-terminal His-Tag sequence. Purified  
228 recombinant bovine Bid protein (Figure 5B) was incubated with serially titrated  
229 concentrations of active bovine granzyme B for 2 hours and the reaction products  
230 were separated by SDS-PAGE (Figure 5C). Bovine recombinant Bid was cleaved by  
231 active bovine granzyme B as revealed by the detection of an N-terminus fragment of  
232 bovine recombinant Bid by an anti-His-Tag antibody in Western Blot (Figure 5D). A

233 reduction in the concentration of bovine granzyme B was associated with a declining  
234 ability to cleave bovine recombinant Bid. As controls, an inactive form of bovine  
235 granzyme B with a serine to alanine substitution at position 195, mock transfected  
236 cells (pFLAG without an insert) and Cos-7 cells alone were analysed; none yielded  
237 truncated Bid products, indicating an inability to cleave bovine recombinant Bid. In  
238 conclusion, these results indicate that bovine granzyme B mediates cytotoxic effects  
239 through the activation of Bid.

240

## 241 **Discussion**

242 In this study we aimed to examine the role of bovine granzyme B in the cytotoxic  
243 function of *T. parva*-specific CD8+ T-cell responses. To achieve this we established  
244 an *in vitro* substrate-specific assay to detect and quantify expression of bovine  
245 granzyme B protein, employing recombinant bovine granzyme B expressed in Cos-7  
246 cells. Using this assay, we showed that the levels of killing of different *T. parva*-  
247 specific CD8+ T cell clones are significantly correlated with levels of granzyme B  
248 protein and that killing of infected cells by bovine CD8+ T cells is mediated by the  
249 granule exocytosis pathway and critically requires granzyme B for induction of cell  
250 death. Furthermore, we provided evidence that granzyme B-mediated death of  
251 parasitized cells is independent of caspases, suggesting that instead the cell death  
252 may be induced via activation of Bid, which we show is cleaved by bovine granzyme  
253 B.

254 Granzyme B was selected for analysis in this study as it has been shown to be the  
255 most potent effector molecule utilized by CD8+ T cells to kill infected cells in both  
256 humans and mice. Results obtained from generation of recombinant bovine

257 granzyme B and analysis of its biological activity demonstrated many similarities to  
258 its human and murine orthologues. This included evidence that processing of the  
259 translated polypeptide is similar to that described for humans and mice, with deletion  
260 of the dipeptide/G a prerequisite for activation of cattle as well as human and murine  
261 granzyme B (21, 22). Similarly, mutation of Ser<sub>195</sub>, one of the functional triad of  
262 residues at the conserved catalytic site (His, Asp and Ser), was demonstrated to  
263 ablate enzymatic activity of the active form of bovine granzyme B confirming, that as  
264 with the murine and human proteins, this residue is a critical component of the  
265 enzyme's active site (23). These similarities extended to the substrate specificities of  
266 the human, murine and bovine forms of granzyme B, with recombinant mature  
267 bovine granzyme B showing the capacity to cleave AC-IEPD-pNA. This activity forms  
268 the basis of a sensitive and reliable *in vitro* method to measure murine and human  
269 granzyme B activity (24).

270 By exploiting this cross-species similarity we were able to generate an equivalent  
271 assay for cattle and so investigate levels of biologically active bovine granzyme B  
272 and its relation to cytotoxic activity of CD8<sup>+</sup> T cells in cattle, overcoming an obstacle  
273 posed by the lack of specific antibodies for bovine granzyme B. The demonstration  
274 of strong activity against this substrate confirms that cattle granzyme B displays  
275 Aspase activity, which is a characteristic feature of granzyme B, with no other known  
276 serine protease in mammals having a preference for cleaving Aspartic acid-  
277 containing substrates (25). The granzyme B inhibitors AC-IEPD-CHO and Z-IETD-  
278 FMK are non-cell-permeable and cell-permeable compounds respectively, which are  
279 known inhibitors of human and rodent granzyme B (19, 26). Herein, we have  
280 demonstrated that these compounds also effectively inhibit bovine granzyme B,  
281 further highlighting the cross-species functional similarities. However, the inability of

282 another two inhibitors of human and murine granzyme B (Z-AAD-CMK and AC-  
283 AAVALLPAVLLALLAPIETD-CHO) to block bovine granzyme B (data now shown)  
284 emphasises that extrapolating functional parameters based on orthology can't be  
285 assumed for granzymes and must be empirically validated.

286 This also applies to the pathways utilised by granzyme B to mediate killing, which  
287 are known to be species-dependent. Mouse granzyme B predominantly functions  
288 through the direct activation of caspases to promote apoptosis, whereas human  
289 granzyme B acts mainly via a Bid-dependent pathway (16, 27). Consequently, the  
290 mechanisms used by bovine granzyme B to induce cell death could not be implied  
291 based on cross-species extrapolation. Work described in this study demonstrates  
292 that bovine granzyme B, like its human orthologue, is capable of cleaving Bid protein  
293 *in vitro*, thus providing evidence indicating that Bid activation can be utilised by  
294 bovine granzyme B for cell death induction. Although activation of caspases was  
295 initially thought to be important in granzyme B-mediated cell death, studies by many  
296 groups revealed that requirement for caspase activation, even in mice, isn't absolute.  
297 For example, an *in vitro* study of mouse CD8+ T cells showed that apoptotic nuclear  
298 damage induced by granule exocytosis was abrogated by the caspase inhibitor Z-  
299 VAD-FMK, whereas lysis of the cells was unaffected. In contrast, target cell lysis  
300 induced by the pro-apoptotic drug cisplatin was specifically blocked by this inhibitor  
301 (28). Similar results have been obtained in studies with purified human granzyme B;  
302 caspase inhibition preventing granzyme-induced DNA damage but not cell lysis (29).  
303 These observations are consistent with the results obtained in this study, which  
304 showed that Z-VAD-FMK inhibited cisplatin-induced apoptosis of *Theileria*-infected  
305 cells, but did not inhibit granzyme B-mediated cytolytic activity of cattle CD8+ T cells.  
306 *T. parva* has been shown to protect infected cells from apoptosis by utilizing *NF-κB*

307 activation to induce the expression of anti-apoptotic proteins such as FLIP (which  
308 functions as a catalytically inactive form of caspase-8), X-chromosome-linked  
309 inhibitor of apoptosis protein (XIAP) and c-IAP (which block caspase-9 and also  
310 downstream executioner caspases 3 and 7) (30). Studies by Guernon in 2003  
311 showed that drug-induced parasite death in *Theileria*-infected cells resulted in  
312 apoptosis involving activation of caspases 9 and 3 and was inhibited by Z-VAD-FMK  
313 (31). These findings confirmed that bovine caspases in non-granzyme B mediated  
314 killing are capable of inducing cell death and that Z-VAD-FMK is an effective inhibitor  
315 of bovine caspases. The inhibition of killing by *T. parva*-specific CD8+ T cell clones  
316 by Z-IETD-FMK but not Z-VAD-FMK in the current study demonstrates that T cell-  
317 mediated killing of *T. parva*-infected cells is dependent on granzyme B but  
318 independent of caspases. Although this may be universally applicable to bovine  
319 granzyme B mediated cytotoxicity, it is important to note that as a consequence of  
320 the negative regulation of caspases by intracellular inhibitors induced by the *NF- $\kappa$ B*  
321 pathway in *T. parva*-infected cells the apparent redundancy of caspases might be a  
322 feature of this specific biological context.

323 The prime rationale for conducting this study was to better understand the molecular  
324 mechanisms that underlie the functional capacity of *T. parva*-specific CD8+ T-cells.  
325 The critical role that these cells play in mediating immunological protection against *T.*  
326 *parva* (29) has led to considerable efforts to identify CD8 T cell target antigens for  
327 use in generating novel subunit vaccines (32, 33). A number of *T. parva* antigens  
328 recognised by CD8 T cells from immune cattle have been identified and, although  
329 they have proved to be immunogenic when used in prime-boost immunisation  
330 protocols, the CD8+ T-cells elicited have generally exhibited poor cytotoxicity and  
331 have been demonstrated to be poorly protective upon *in vivo* challenge (9).

332 Understanding the discrepancy between immunogenicity and protective efficacy will  
333 be critical to defining the 'correlates of protection' that can guide subsequent vaccine  
334 development. Ongoing work is applying transcriptomics to address this issue,  
335 however such approaches used in isolation have limitations.

336 Our data, from assays of expressed biologically active granzyme B, revealed a  
337 statistically significant correlation between the levels of granzyme B enzymatic  
338 activity in cell lysates (and supernatants) of cloned CD8+ T cell lines and levels and  
339 killing of *T. parva*-infected cells, indicating that granzyme B is a dominant effector  
340 molecule in CD8+ T-cell mediated killing of these parasitized cells. A prominent role  
341 for granzyme B was corroborated by subsequent analysis showing that the  
342 membrane-permeable inhibitor of granzyme B, Z-IETD-FMK, reduced *T. parva*-  
343 infected cell lysis by these CD8+ T-cells by 70-100%. However, the correlation was  
344 not absolute. For example, one clone consistently showed low levels of granzyme B  
345 content and release but displayed relatively strong killing (Figure 3A). Such  
346 discrepancies suggest that additional factors, such as other granzymes, that may  
347 vary between T cells clones also contribute to the cytotoxic activity of these CD8+ T  
348 cells. There is substantial evidence from studies in humans and mice that other  
349 granzymes can effectively mediate cell death by themselves and/or synergistically  
350 increase the activity of granzyme B *in vitro*. Examples from the literature include i)  
351 co-transfection of rat basophilic leukemia (RBL) cells with granzyme A and granzyme  
352 B in the presence of perforin resulting in enhanced killing of tumour targets in a  
353 synergistic manner (34); ii) human granzyme H can augment granzyme B-mediated  
354 killing of adenovirus-infected cells (35-37) by neutralizing the viral inhibitor of  
355 granzyme B (L4-100K assembly protein) (36, 37) and iii) human granzyme M can  
356 rapidly induce cell death of tumor cells *in vitro* directly (38-40) as well as hydrolyse

357 PI-9, thereby inactivating its inhibitory function for granzyme B (41). Such examples  
358 illustrate the potential for other bovine granzymes to cooperate with granzyme B in  
359 achieving CD8+ T cell-mediated cell death of *T. parva*-infected cells. Unfortunately,  
360 further investigation of these interactions in cattle is hampered by the current lack of  
361 specific antibodies and biological assays to measure other bovine granzyme  
362 proteins. However, this study, which provides the first description of the biological  
363 activity of a member of the granzyme family in cattle, exemplifies an approach that  
364 could readily be applied to study other bovine granzymes.

365 In conclusion, work described in this paper has developed molecular and  
366 biochemical methods to define the functional activities of bovine granzyme B and  
367 demonstrated an indispensable role for granzyme B in killing of *T. parva*-infected cells  
368 by specific CD8+ T cells. This study represents the first dissection of the effector  
369 mechanisms employed in killing of target cells by bovine CD8+ T cells and  
370 specifically provides the first evidence that granzyme B plays a key role in killing of  
371 *T. parva*-infected cells by specific CD8+ T cells.

372

## 373 **Materials and Methods**

374 **Animals and T cell lines.** Four Holstein-Friesian animals (011, 592, 641 and 633)  
375 homozygous for the A10 or A18 MHC I haplotypes were used for the study. Their  
376 MHC types were determined by a combination of serological typing (42) and MHC I  
377 allele-specific PCR (43). The animals were aged 18–36 month at the outset of the  
378 study and were maintained indoors on rations of hay and concentrate. Cattle were  
379 immunized against the Muguga stock of *T. parva* (TpM) by infection with  
380 cryopreserved sporozoites and simultaneous administration of a long-acting



381 formulation of oxytetracycline as described previously (2). Animals were challenged  
382 with a lethal dose of sporozoites on two occasions at ~18-month intervals following  
383 immunization. All animal experimental work was completed in accordance with the  
384 Animal (Scientific Procedures) Act 1986. *T. parva*-specific CD8+ T cell lines and  
385 clones were generated from the immune cattle and maintained as described  
386 previously (44).

387 **Standard and semi-quantitative PCR assays.** Total RNA was extracted from *T.*  
388 *parva*-specific CD8+ T cell lines from immunized cattle using Tri-reagent (Sigma)  
389 and cDNA was synthesised using the Reverse Transcription System (Promega) with  
390 priming by the Oligo (dT)15 primer, both according to the manufacturer's  
391 instructions. The primers for granzymes and perforin and the protocols for standard  
392 PCR reactions were as previously described (12). For semi-quantitative PCR, the  
393 sequences of primers were as follows: granzyme B: 5'-ACT GGA ATC AGG ATG  
394 TCC AGA G-3' (Forward), 5'- TTT GGG TCC CCC ACA CAC AG-3' (Reverse) and  
395 Gapdh: 5'-ACC CCT TCA TTG ACC TTC AC-3' (Forward); 5'-TTC ACG CCC ATC  
396 ACA AAC ATG-3' (Reverse). The PCR reactions were composed of 20pmol of  
397 granzyme B/perforin primers and 10pmol of Gapdh primers, 2.5 units BIOTAQ (5  
398 units/ul, Biotline), 2.5ul SM-0005 buffer, 0.05ug of cDNA template and nuclease-free  
399 water to give a final volume of 25ul. The primers for perforin and the protocol for  
400 PCR programme were as described above. Semi-quantified PCR products were  
401 analysed by 1.5% agarose gel electrophoresis and the density of the specific bands  
402 was measured by computer software (KODAK 1D 3.6 version).

403 **Cloning of bovine granzyme B cDNA constructs.** Full-length bovine wild-type  
404 (WT) granzyme B was amplified from cDNA by high fidelity PCR, using primers  
405 flanking the coding sequence as previously described (12). The high fidelity PCR

406 protocol was composed of 10pmol of primers, 1.2 unit *Pfu* DNA polymerase (3  
407 units/ul, Promega), 10x Buffer with MgSO<sub>4</sub> (Promega), 10mM dNTP, 0.5ug of cDNA  
408 template and nuclease-free water to give a final volume of 50ul. The programme  
409 used was as follows: 95°C for 2 min, 30 cycles of 95°C for 1min followed by 55°C for  
410 0.5 min and 72°C for 2.5 min, and a final extension period of 72°C for 5 min. To  
411 generate cDNA encoding active granzyme B, six nucleotides encoding a dipeptide  
412 segment in the wild-type granzyme B cDNA (which inhibits granzyme B function and  
413 is present in pro-granzyme B but absent in fully mature granzyme B) were deleted by  
414 PCR splice overlap extension (PCR-SOE), based on procedures described for  
415 human granzyme B (21). Briefly, two PCR assays were initially performed to  
416 generate two overlapping fragments that carry the six-nucleotide deletion in the  
417 overlapping segment. These reactions utilised the external flanking primers  
418 described above with the following internal primers: 5'-  
419 CAAAGGCAATCATCGGGGGCCATG-3' (Forward); 5'-  
420 CCCGATGATTGCCTTTGCCCTGGG-3' (Reverse). The resulting two fragments  
421 were mixed, denatured and annealed to produce deletion mutant DNA templates and  
422 amplification of the extended DNAs was performed with flanking primers in a further  
423 PCR. Substitution of Ser with Ala at the active site of dipeptide-knockout cDNA was  
424 performed by 'megaprimer' PCR mutagenesis (45, 46) using an internal mutagenic  
425 forward primer incorporating the mutation as follows: 5'-  
426 AGAAAGCTTCCTTTCAGGGGGACGCGG-3'. Briefly, an initial 5 cycles of a PCR  
427 reaction containing 50pmol of internal mutagenic forward primer and 2.5pmol of a  
428 flanking reverse primer (as described above) was followed by a prolonged extension  
429 step to generate mutant mega fragments. 50pmol of the other flanking primer (as  
430 described above) was added to the mutant templates and the PCR reaction

431 subjected to a further 25 cycles to generate full-length product containing the  
432 mutation. All three bovine granzyme B cDNAs were sub-cloned into the pFLAG-  
433 CMV<sup>tm</sup>-5a expression vector (Sigma) and nucleotide sequencing performed by DBS  
434 Genomic (Durham University).

435 **Expression of granzyme B in Cos-7 cells.** Cos-7 cells were maintained in  
436 Dulbecco's Minimal Essential Medium (DMEM, Invitrogen) supplemented with 10%  
437 FCS,  $5 \times 10^{-5}$  M 2-Mercaptoethanol, 4mM glutamine, 100U/ml penicillin and 100ug/ml  
438 streptomycin, at 37°C with 5% CO<sub>2</sub>. Cos-7 cells were transfected in 75cm<sup>2</sup> flasks  
439 with the pFLAG-CMV<sup>tm</sup>-5a vector containing each of the three cattle granzyme B  
440 recombinant cDNAs (wild type (60ug), dipeptide knockout (60ug) and knockout with  
441 a Ser195Ala substitution (40ug)) or vector only (60ug). The transient transfection  
442 was performed by using the Lipofectamine<sup>tm</sup> 2000 reagent (Invitrogen) according to  
443 the manufacturer's protocol. Transfected cells were harvested after 48h, washed and  
444 suspended in cold PBS and analysed in further experiments. To test for expression  
445 of transfected DNA products, cyospin smears of cells were examined  
446 microscopically with anti-FLAG M2 antibody (1:500 dilution; IgG1; Sigma). The  
447 transfection efficiency of pFLAG vectors containing three bovine granzyme B  
448 recombinant cDNAs containing WT, the dipeptide knockout and the knockout with an  
449 additional Ser195Ala substitution was 35%, 33% and 33%, respectively.

450 **Granzyme B protease activity in transfected Cos-7 cells.** Cell lysis and assay of  
451 protease activity were performed as previously described for equine granzyme B  
452 (47). Briefly, aliquots of 1ml of PBS-washed Cos-7 cells adjusted to  $2 \times 10^6$  cells/ml in  
453 PBS were pelleted and lysed by addition of 0.2ml lysis buffer (1% Triton X-100,  
454 50mM Tris, pH8.0 and 2ul of Benzonase Nuclease 25U/ml, Purity>99%, Merck).  
455 Following incubation on ice for 20min, lysed cells were centrifuged at 21,000 x g for

456 10min at 0°C to pellet cell nuclei and other cell debris. Supernatants were harvested  
457 and assayed in duplicate for protease activity; aliquots of 25ul of lysis supernatant,  
458 granzyme B substrate Ac-IEPD-pNA, (Calbiochem) at a final concentration of 300uM  
459 and reaction buffer (0.1M Hepes, pH 7.0; 0.3M NaCl; 1mM EDTA) in a total volume  
460 of 250ul/well were added into the wells of Falcon™ 96-Well Flat bottomed  
461 Microplates (BD). The chymotrypsin substrate I, Suc-GGF-pNA (Calbiochem), was  
462 used as a negative control for substrate specificity. The reaction was composed of  
463 25ul of lysis supernatant, 1mM Suc-GGF-pNA in the final concentration and the  
464 reaction buffer (50mM Tris, 100mM NaCl, pH8.0) in a total volume of 125ul. Mixtures  
465 were incubated at 37°C for 4h and the colour reaction generated by cleavage of the  
466 pNA substrate measured at a wavelength of 405nm by using a Synergy™ HT Multi-  
467 Mode Microplate Reader (BioTek). For inhibition of active bovine granzyme B  
468 protease activity in lysates, aliquots of 25ul of lysis supernatant containing active  
469 bovine granzyme B were pre-incubated with 10uM Ac-IEPD-CHO (the granzyme B  
470 inhibitor, Calbiochem) at 37°C for 0.5h.

471 **Granzyme B activity in CD8+ T cell lines.** Methods used for measurement of  
472 granzyme B in T cell lysates and supernatants were based on procedures previously  
473 described for human and equine granzyme B (24, 47). CD8+ T cells washed in PBS  
474 were adjusted to  $1 \times 10^6$  cells/ml in PBS, pelleted and lysed by addition of 50ul of a  
475 lysis buffer per ml as described above. To examine granzyme B release, aliquots of  
476  $1 \times 10^6$  CD8+ T cells were distributed into the wells of 96-well V-bottomed plates  
477 together with  $5 \times 10^5$  target cells in a total volume of 200ul phenol-red-free complete  
478 media (RPMI 1640 with 5% FCS, Invitrogen,). Control wells containing effector cells  
479 and medium were also included. After incubation in an atmosphere of 5% CO<sub>2</sub> at  
480 37°C for 4h, the plates were centrifuging for 10min at 400xg and supernatants were

481 collected. Granzyme B activity was measured by adding aliquots of 10ul of cell  
482 lysates or 40ul of culture supernatants in duplicate to wells of Falcon™ 96-well flat-  
483 bottomed Microplates (BD) together with 200uM granzyme B substrate, Ac-IEPD-  
484 pNA, (Calbiochem) and reaction buffer (0.1M HEPES, pH7.0; 0.3M NaCl; 1mM  
485 EDTA) in a total volume of 100ul/well. Wells containing reaction buffer and substrate  
486 control were also included as controls. Mixtures were incubated at 37°C for 4h and  
487 the colour reaction generated by cleavage of the pNA (p-nitroaniline) substrate  
488 measured at a wavelength of 405nm using a Synergy™ HT Multi-Mode Microplate  
489 Reader (BioTek). To test for specificity of the reaction, CD8+ T cells were pre-  
490 incubated with the cell-permeable granzyme B inhibitor, Z-IETD-FMK (40uM) for 1h  
491 prior to preparation and testing of cell lysates as describe above. 40uM Z-VAD-FMK,  
492 a pan-caspase inhibitor was used as a negative control, whereas a non-cell-  
493 permeable granzyme B inhibitor, AC-IEPD-CHO (10uM) was used to inhibit  
494 granzyme B activity in lysates as a positive control.

495 **Cytotoxicity assays.** Standard 4-hour [<sup>111</sup>In]-release cytotoxicity assays were used  
496 to measure cytotoxicity of CD8+ T cell clones, using as target cells either autologous  
497 *T. parva*-infected cells or autologous *T. annulata* - transformed cells incubated with  
498 peptide for 0.5h prior to the assay (44). Peptides were supplied by Pepscan Systems  
499 (Lelystad, The Netherlands). All assays were conducted in duplicate, and controls  
500 included *T. annulata*-infected target cells without added peptide and, where  
501 appropriate, MHC-mismatched *T. parva*-infected target cells. Cytotoxicity assays  
502 were established and specific lysis was measured as described previously (44). For  
503 inhibition of perforin activity, effector cells were pre-incubated with ten-fold dilutions  
504 of concanamycin A (CMA) at final concentrations ranging from 0.1ug/ml to  
505 1000ug/ml for 2h at 37 °C. For inhibition of granzyme B activity, effector cells were

506 pre-incubated for 1h at 37°C with 40uM Z-IETD-FMK and the negative control, pan-  
507 caspase inhibitor Z-VAD-FMK (40uM). For inhibition of caspase activity, <sup>111</sup>In  
508 labelled target cells were pre-incubated with 80uM Z-VAD-FMK and the negative  
509 control, cathepsin B Inhibitor Z-FA-FMK (80uM) for 1h at 37°C.

510 **Generation of recombinant bovine Bid.** Wild-type bovine Bid cDNA was amplified  
511 using primers flanking the full-length coding region of bovine Bid as follows: 5'-  
512 GAAGCTTAGCATATGGATTTGAAGGTTAGC- 3' (Forward); 5'-  
513 TTCTGCCGAGGATCCACTCAGTCCATCTGATTTCCGG- 3' (Reverse). The amplified  
514 PCR products were purified and sub-cloned into the NdeI and BamHI sides of pET-  
515 15b vector (Novagen) and nucleotide sequencing performed by DBS Genomic  
516 (Durham University). The protocols for expression and purification of recombinant  
517 bovine Bid proteins were performed as previously described for human Bid (48).  
518 Briefly, pET-15b expression vectors containing wild-type bovine Bid cDNA were  
519 transformed in *E.coli* BL21 (DE3) pLYsS (Novagen) and expressed in the presence  
520 of IPTG. The expressed products, which carry an N-terminal His-Tag sequence,  
521 were purified with automated immobilised metal affinity chromatography (IMAC)  
522 using a nickel affinity column (Qiagen) and further purified with automated ion  
523 exchange chromatography (IEC) using a Mono Q column (Pharmacia).

524 **Proteolysis of recombinant bovine Bid by bovine granzyme B.** Two-fold dilutions  
525 of lysates containing active bovine granzyme B at final concentrations ranging from  
526 10ng to 0.04ng in 10ul reaction volumes were incubated with 3ug of recombinant  
527 bovine Bid for 2h at 37°C. Inactive mutated bovine granzyme B (an alanine  
528 substitution at position 195), mock (pFLAG without an insert) and Cos-7 cells alone  
529 were used as negative controls for granzyme B proteolysis specificity. Reaction  
530 products were separated by SDS-PAGE (NuPAGE 4-12% Bis-Tris gel, Thermo

531 Fisher) and visualized by Coomassie blue staining. The reaction products were  
532 transferred using the iBlot (Thermo Fisher) for Western blotting, according to the  
533 manufacturer's instructions. The blots were probed with anti-His Tag antibody  
534 (1:2500 dilution, Thermo Fisher) and anti-FLAG M2 antibody (1:1000 dilution, Sigma)  
535 and detected by chemiluminescence using HRP-labelled rabbit anti-mouse IgG  
536 (H+L) secondary antibody (1:5000 dilution, Thermo Fisher).

537 **Statistical analysis.** Statistical analyses were performed using Minitab software  
538 (Minitab® 15.1.20.0, Minitab Inc.). The correlation between variables was analysed  
539 by Pearson's correlation test. P-values < 0.05 were considered significant.

540

## 541 **Acknowledgements**

542 This work was supported in part by a grant awarded by the Bill and Melinda Gates  
543 Foundation jointly with the UK Department for International development (DfID) [No.  
544 OPP1078791] and a Biotechnology and Biological Sciences Research Council  
545 (BBSRC) Institute ISP grant (grant number BB/J004227/1). Jie Yang was supported  
546 by a China Scholarship Council/University of Edinburgh Scholarship. The authors  
547 also wish to thank Kathryn Degnan and Robyn Cartwright for expert technical  
548 assistance, Dr Andy Gill for technical assistance with protein purification and  
549 analysis and Dr Darren Shaw for statistical help and advice.

550

## 551 **References**

552 1. Morrison WI, Connelley T, Hemmink JD, MacHugh ND. 2015. Understanding  
553 the basis of parasite strain-restricted immunity to *Theileria parva*. Ann Rev  
554 Anim Biosci 3:397-418.

- 555 2. Radley DE, Brown CGD, Burridge MJ, Cunningham MP, Kirimi IM, Purnell  
556 RE, Young AS. 1975. East coast fever: 1. Chemoprophylactic immunization of  
557 cattle against *Theileria parva* (Muguga) and five *Theileria* strains. Vet  
558 Parasitol 1:35–41.
- 559 3. Morrison WI, Goddeeris BM, Teale AJ, Grocock CJ, Kemp S, Stagg DA.  
560 1987. Cytotoxic T-cells elicited in cattle challenged with *Theileria parva*  
561 (Muguga): evidence for restriction by class I MHC determinants and parasite  
562 strain specificity. Parasite Immunol 9:563-578.
- 563 4. Goddeeris BM, Morrison WI, Toye PG, Bishop R. 1990. Strain specificity of  
564 bovine *Theileria parva*-specific cytotoxic T cells is determined by the  
565 phenotype of the restricting class I MHC. Immunology 69:38-44.
- 566 5. McKeever DJ, Taracha EL, Innes E, MacHugh ND, Awino E, Goddeeris BM,  
567 Morrison WI. 1994. Adoptive transfer of immunity to *Theileria parva* in the  
568 CD8+ fraction of responding efferent lymph. Proc Natl Acad Sci USA 91:1959-  
569 1963.
- 570 6. Vassalli P. 1992. The pathophysiology of tumor necrosis factors. Annu Rev  
571 Immunol 10:411-452.
- 572 7. Boehm U, Klamp T, Groot M, Howard JC. 1997. Cellular responses to  
573 interferon-gamma. Annu Rev Immunol 15:749-795.
- 574 8. DeMartini,JC, Baldwin CL. 1991. Effects of gamma interferon, tumor necrosis  
575 factor alpha, and interleukin-2 on infection and proliferation of *Theileria parva*-  
576 infected bovine lymphoblasts and production of interferon by parasitized cells.  
577 Infect Immun 59:4540-4546.
- 578 9. Graham SP, Pelle R, Honda Y, Mwangi DM, Tonukari NJ, Yamage M, Glew  
579 EJ, de Villiers EP, Shah T, Bishop R, Abuya E, Awino E, Gachanja J, Luyai



- 580 AE, Mbwika F, Muthiani AM, Ndegwa DM, Njahira M, Nyanjui JK, Onono FO,  
581 Osaso J, Saya RM, Wildmann C, Fraser CM, Maudlin I, Gardner MJ, Morzaria  
582 SP, Loosmore S, Gilbert SC, Audonnet JC, van der Bruggen P, Nene V,  
583 Taracha EL. 2006. *Theileria parva* candidate vaccine antigens recognized by  
584 immune bovine cytotoxic T lymphocytes. Proc Natl Acad Sci USA 103:3286-  
585 3291.
- 586 10. Jenne DE, Tschopp J. 1988. Granzymes, a family of serine proteases  
587 released from granules of cytolytic T lymphocytes upon T cell receptor  
588 stimulation. Immunol Rev 103:53-71.
- 589 11. Grossman WJ, Revell PA, Lu ZA, Johnson H, Bredemeyer AJ, Ley TJ. 2003.  
590 The orphan granzymes of humans and mice. Curr Opin Immunol 15:544-552.
- 591 12. Yang J, Vrettou C, Connelley T, Morrison WI. 2018. Identification and  
592 annotation of bovine granzyme genes reveals a novel granzyme encoded  
593 within the trypsin-like locus. Immunogenetics (in press).
- 594 13. Smyth MJ, O'Connor MA, Trapani JA. 1996. Granzymes: a variety of serine  
595 protease specificities encoded by genetically distinct subfamilies. J Leukoc  
596 Biol 60:555-562.
- 597 14. Lieberman J. 2003. The ABCs of granule-mediated cytotoxicity: new weapons  
598 in the arsenal. Nat Rev Immunol 3:361-370.
- 599 15. Anthony D, Andrews ADM, Watt SV, Trapani JA, Smyth MJ. 2010. Functional  
600 dissection of the granzyme family: cell death and inflammation. Immunol Rev  
601 235:73-92.
- 602 16. Cullen SP, Adrain C, Luthi AU, Duriez PJ, Martin SJ. 2007. Human and  
603 murine granzyme B exhibit divergent substrate preferences. J Cell Biol  
604 176:435-444.

- 605 17. Kataoka T, Shinohara N, Takayama H, Takaku K, Kondo S, Yonehara S,  
606 Nagai K. 1996. Concanamycin A, a powerful tool for characterization and  
607 estimation of contribution of perforin- and Fas-based lytic pathways in cell-  
608 mediated cytotoxicity. *J Immunol* 156:3678-3686.
- 609 18. Kataoka T, Takaku K, Magae J, Shinohara N, Takayama H, Kondo S, Nagai  
610 K. 1994. Acidification is essential for maintaining the structure and function of  
611 lytic granules of CTL. Effect of concanamycin A, an inhibitor of vacuolar type  
612 H(+)-ATPase, on CTL-mediated cytotoxicity. *J Immunol* 153:3938-3947.
- 613 19. Thornberry NA, Rano TA, Peterson EP, Rasper DM, Timkey T, Garcia-Calvo  
614 M, Houtzager VM, Nordstrom PA, Roy S, Vaillancourt JP, Chapman KT,  
615 Nicholson DW. 1997. A combinatorial approach defines specificities of  
616 members of the caspase family and granzyme B. Functional relationships  
617 established for key mediators of apoptosis. *J Biol Chem* 272:17907-17911.
- 618 20. Watchmaker PB, Urban JA, Berk E, Nakamura Y, Mailliard RB, Watkins SC,  
619 van Ham SM, Kalinski P. 2008. Memory CD8+ T cells protect dendritic cells  
620 from CTL killing. *J Immunol* 180:3857-3865.
- 621 21. Smyth MJ, McGuire MJ, Thia KY. 1995. Expression of recombinant human  
622 granzyme B. A processing and activation role for dipeptidyl peptidase I. *J*  
623 *Immunol* 154:6299-6305.
- 624 22. Caputo A, Garner RS, Winkler U, Hudig D, Bleackley RC. 1993. Activation of  
625 recombinant murine cytotoxic cell proteinase-1 requires deletion of an amino-  
626 terminal dipeptide. *J Biol Chem* 268:17672-17675.
- 627 23. Caputo A, James MN, Powers JC, Hudig D, Bleackley RC. 1994. Conversion  
628 of the substrate specificity of mouse proteinase granzyme B. *Nat Struct Biol*  
629 1:364-367.

- 630 24. Ewen C, Kane KP, Shostak I, Griebel PG, Bertram EM, Watts TH, Bleackley  
631 RC, McElhaney JE. 2003. A novel cytotoxicity assay to evaluate antigen-  
632 specific CTL responses using a colorimetric substrate for Granzyme B. J  
633 Immunol Methods 276:89-101.
- 634 25. Poe M, Blake JT, Boulton DA, Gammon M, Sigal NH, Wu JK, Zweerink HJ.  
635 1991. Human cytotoxic lymphocyte granzyme B. Its purification from granules  
636 and the characterization of substrate and inhibitor specificity. J Biol Chem  
637 266:98-103.
- 638 26. Harris JL, Peterson EP, Hudig D, Thornberry NA, Craik CS. 1998. Definition  
639 and redesign of the extended substrate specificity of granzyme B. J Biol  
640 Chem 273:27364-27373.
- 641 27. Kaiserman D, Bird CH, Sun J, Matthews A, Ung K, Whisstock JC, Thompson  
642 PE, Trapani JA, Bird PI. 2006. The major human and mouse granzymes are  
643 structurally and functionally divergent. J Cell Biol 175:619-630.
- 644 28. Sarin A, Williams MS, Alexander-Miller MA, Berzofsky JA, Zacharchuk CM,  
645 Henkart PA. 1997. Target cell lysis by CTL granule exocytosis is independent  
646 of ICE/Ced-3 family proteases. Immunity 6:209-215.
- 647 29. Trapani JA, Jans DA, Jans PJ, Smyth MJ, Browne KA, Sutton VR. 1998.  
648 Efficient nuclear targeting of granzyme B and the nuclear consequences of  
649 apoptosis induced by granzyme B and perforin are caspase-dependent, but  
650 cell death is caspase-independent. J Biol Chem 273:27934-27938.
- 651 30. Kuenzi P, Schneider P, Dobbelaere DA. 2003. *Theileria parva*-transformed T  
652 cells show enhanced resistance to Fas/Fas ligand-induced apoptosis. J  
653 Immunol 171:1224-1231.

- 654 31. Guernon J, Dessauge F, Langsley G, Garcia A. 2003. Apoptosis of *Theileria*-  
655 infected lymphocytes induced upon parasite death involves activation of  
656 caspases 9 and 3. *Biochimie* 85:771-776.
- 657 32. Nene V, Morrison WI. 2016. Approaches to vaccination against *Theileria*  
658 *parva* and *Theileria annulata*. *Parasite Immunol* 38:724-734.
- 659 33. Graham SP, Pelle R, Yamage M, Mwangi DM, Honda Y, Mwakubambanya  
660 RS, de Villiers EP, Abuya E, Awino E, Gachanja J, Mbwika F, Muthiani AM,  
661 Muriuki AM, Nyanjui JK, Onono JO, Osaso J, Riitho V, Saya RM, Ellis SA,  
662 McKeever DJ, MacHugh ND, Gilbert SC, Audonnet JC, Morrison WI, van der  
663 Bruggen P, Taracha EL. 2008. Characterization of the fine specificity of  
664 bovine CD8 T-cell responses to defined antigens from the protozoan parasite  
665 *Theileria parva*. *Infect Immun* 76:685-694.
- 666 34. Nakajima H, Park HL, Henkart PA. 1995. Synergistic roles of granzymes A  
667 and B in mediating target cell death by rat basophilic leukemia mast cell  
668 tumors also expressing cytolysin/perforin. *J Exp Med* 181:1037-1046.
- 669 35. Waterhouse NJ, Trapani JA. 2007. H is for helper: granzyme H helps  
670 granzyme B kill adenovirus-infected cells. *Trends Immunol* 28:373-375.
- 671 36. Andrade F, Fellows E, Jenne DE, Rosen A, Young CS. 2007. Granzyme H  
672 destroys the function of critical adenoviral proteins required for viral DNA  
673 replication and granzyme B inhibition. *EMBO J* 26:2148-2157.
- 674 37. Andrade F, Bull HG, Thornberry NA, Ketner GW, Casciola-Rosen LA, Rosen  
675 A. 2001. Adenovirus L4-100K assembly protein is a granzyme B substrate  
676 that potently inhibits granzyme B-mediated cell death. *Immunity* 14:751-761.

- 677 38. Bovenschen N, de Koning PJ, Quadir R, Broekhuizen R, Damen JM, Froelich  
678 CJ, Slijper M, Kummer JA. 2008. NK cell protease granzyme M targets alpha-  
679 tubulin and disorganizes the microtubule network. *J Immunol* 180:8184-8191.
- 680 39. Kelly JM, Waterhouse NJ, Cretney E, Browne KA, Ellis S, Trapani JA, Smyth  
681 MJ. 2004. Granzyme M mediates a novel form of perforin-dependent cell  
682 death. *J Biol Chem* 279:22236-22242.
- 683 40. Cullen SP, Afonina IS, Donadini R, Luthi AU, Medema JP, Bird PI, Martin SJ.  
684 2009. Nucleophosmin is cleaved and inactivated by the cytotoxic granule  
685 protease granzyme M during natural killer cell-mediated killing. *J Biol Chem*  
686 284:5137-5147.
- 687 41. Mahrus S, Kisiel W, Craik CS. 2004. Granzyme M is a regulatory protease  
688 that inactivates proteinase inhibitor 9, an endogenous inhibitor of granzyme B.  
689 *J Biol Chem* 279:54275-54282.
- 690 42. Ellis SA, Morrison WI, MacHugh ND, Birch J, Burrells A, Stear MJ. 2005.  
691 Serological and molecular diversity in the cattle MHC class I region.  
692 *Immunogenetics* 57:601-606.
- 693 43. Ellis SA, Staines KA, Stear MJ, Hensen EJ, Morrison WI. 1998. DNA typing  
694 for BoLA class I using sequence-specific primers (PCR-SSP). *Eur J*  
695 *Immunogenet* 25:365-370.
- 696 44. Goddeeris BM, Morrison WI. 1988. Techniques for the generation, cloning,  
697 and characterization of bovine cytotoxic T cells specific for the protozoan  
698 *Theileria parva*. *J Tiss Cult Meth* 11:101-110.
- 699 45. Tyagi R, Lai R, Duggleby RG. 2004. A new approach to 'megaprimer'  
700 polymerase chain reaction mutagenesis without an intermediate gel  
701 purification step. *BMC Biotechnol* 4:2.

- 702 46. Picard V, Ersdal-Badju E, Lu A, Bock SC. 1994. A rapid and efficient one-tube  
703 PCR-based mutagenesis technique using Pfu DNA polymerase. *Nucleic Acids*  
704 *Res* 22:2587-2591.
- 705 47. Piuko K, Bravo IG, Muller M. 2007. Identification and characterization of  
706 equine granzyme B. *Vet Immunol Immunopathol* 118:239-251.
- 707 48. Luo X, Budihardjo I, Zou H, Slaughter C, Wang X. 1998. Bid, a Bcl2  
708 Interacting protein, mediates cytochrome C release from mitochondria in  
709 response to activation of cell surface death receptors. *Cell* 94:481-490.

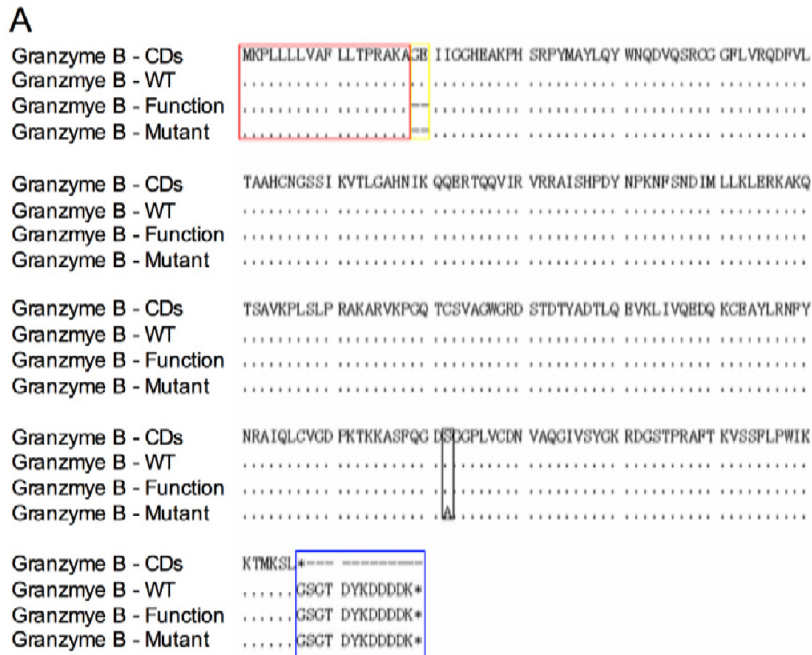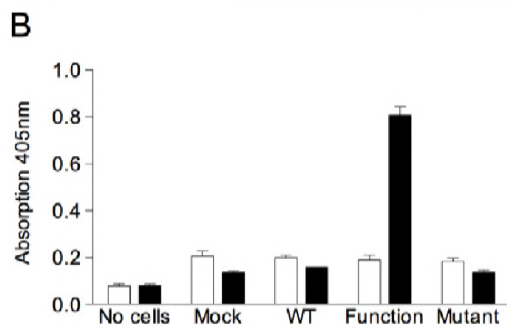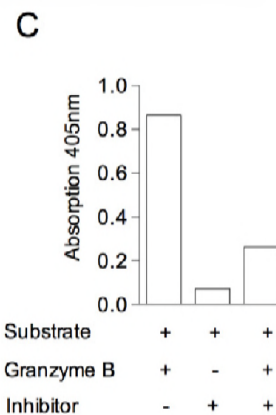

1

2 Figure 1. (A). Amino acid sequences from nucleotide sequences of three recombinant  
 3 forms of bovine granzyme B cDNA, aligned with the reference sequence from the  
 4 genome database. Granzyme B - CDs - the full length cDNA from bovine genome  
 5 (corr\_ENSBTAG00000010057); Granzyme B - WT - pFLAG-CMVtm-5a vector  
 6 containing wide type granzyme B; Granzyme B - Function - pFLAG-CMVtm-5a vector  
 7 containing functional granzyme B; Granzyme B - Mutant - pFLAG-CMVtm-5a vector  
 8 containing functional granzyme B with Ser<sub>195</sub> to Ala<sub>195</sub> mutation. Dot-Identical; Dash-  
 9 Gap; Leader peptide is highlighted in a red box; Dipeptide/GE is in a yellow box;

10 Ser195Ala is in a black box; FLAG epitope-tag sequence of the pFLAG-CMVtm-5a  
11 vector is in blue. (B). Enzymatic activity of different recombinant forms of bovine  
12 granzyme B tested on a granzyme B-specific substrate AC-IEPD-pNA (Filled bars)  
13 and a control substrate Suc-GGF-pNA (Empty bars): Cos-7 cells were transiently  
14 transfected with unmodified granzyme B cDNA (WT), cDNA with the GE dipeptide  
15 deleted (Function) or cDNA containing a deletion of the dipeptide and an alanine  
16 substitution at position 195 (Mutant). The transfection efficiency of Cos-7 cells with  
17 three granzyme B constructs was 35%, 33% and 33%, respectively. Lysates of the  
18 transfected cells collected after 48 hours were incubated with the substrates for 4  
19 hours. Controls consisted of lysates of cells transfected with pFLAG without an insert  
20 (Mock) and buffer (No cells) added to the substrate. Colour reaction generated after 4  
21 hours by cleavage of the pNA substrate were measured at a wavelength of 405nm  
22 using a Synergy™ HT Multi-Mode Microplate Reader (BioTek). (C). Inhibition of the  
23 functional recombinant cattle granzyme B by preincubating with 10uM granzyme B  
24 specific inhibitor AC-IEPD-CHO for 0.5h.

25

26

27



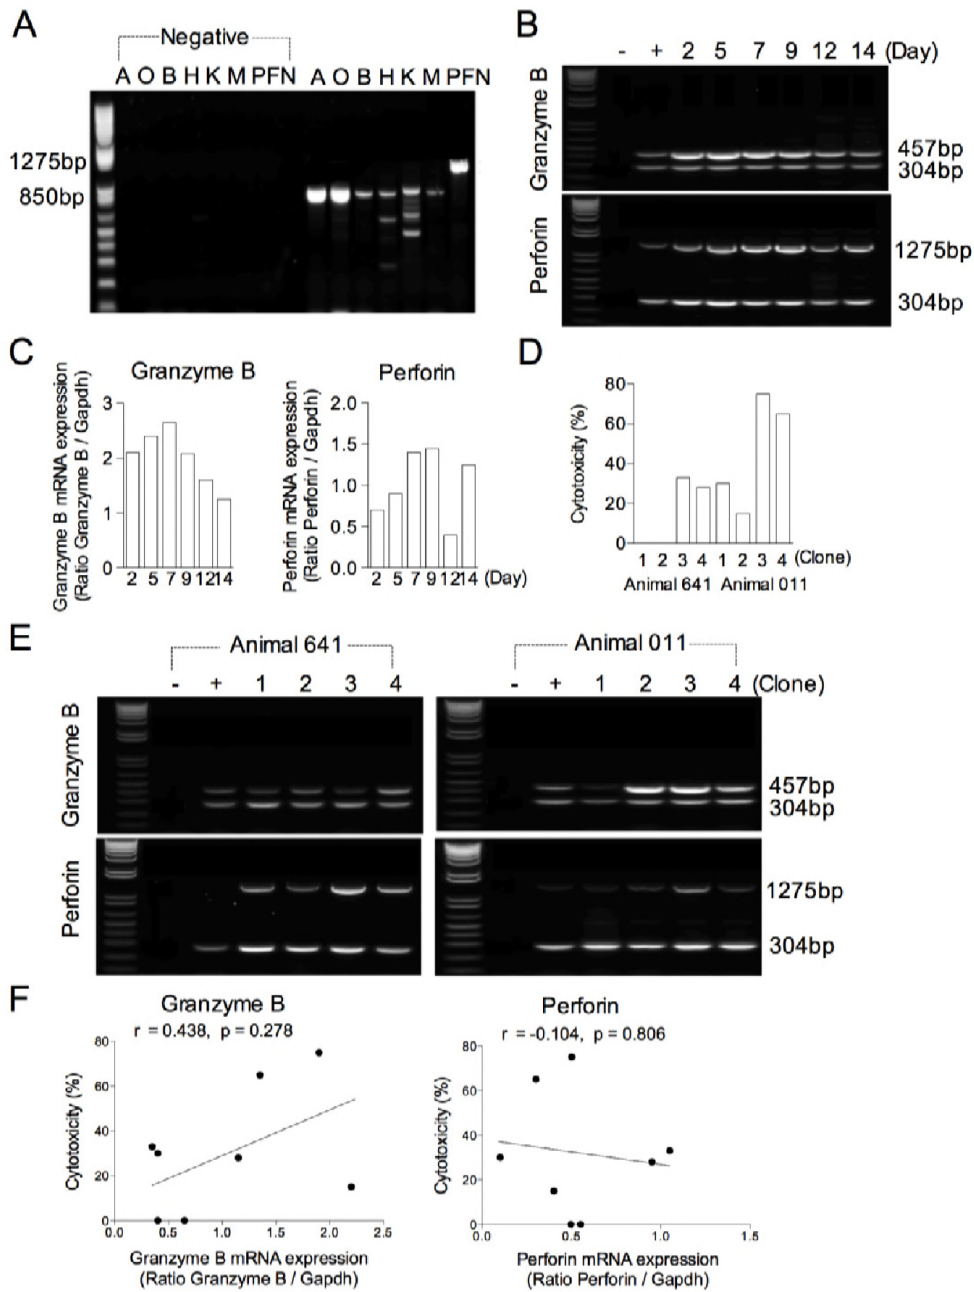

28

29 Figure 2. (A). PCR products obtained for each of the bovine granule enzymes from an  
 30 uncloned *T. parva*-specific CD8+ T cell line (641). The sizes of the PCR products  
 31 obtained were: granzyme A (A) - 838bp; granzyme O (O) - 849bp; granzyme B (B) -  
 32 818bp; granzyme H (H) - 820bp; granzyme K (K) - 889bp; granzyme M (M) - 833bp;  
 33 Perforin (PFN) - 1275bp; Negative controls (primers with no added cDNA template)  
 34 were included in the left of the panel. (B). Agarose gels showing the PCR products for

35 granzyme B (457bp), perforin (1275bp) and the GAPDH control (304bp). Days after  
36 antigenic stimulation are shown. (C). Changes in quantity of PCR product (vertical  
37 axis) at different times following antigenic stimulation, normalised in relation to that of  
38 the GAPDH product obtained from the same sample. (D). Cytotoxic activity of 8 *T.*  
39 *parva*-specific CD8+ T cell clones from two different animals (641 and 1011) assayed  
40 on autologous *T. parva*-infected targets. (E). Agarose gels showing the PCR products  
41 for granzyme B (457bp), perforin (1275bp) and the GAPDH control (304bp) from 8 *T.*  
42 *parva*-specific CD8+ T cell clones (D). (F). Correlation of killing of *Theileria*-infected  
43 target cells by CD8+ T cell clones with levels of mRNA expression of granzyme B ( $r=$   
44  $0.438$ ,  $p= 0.278$ ) and perforin ( $r= -0.104$ ,  $p= 0.806$ ). Changes in quantity of PCR  
45 product (vertical axis) in different T cell clones, normalised in relation to that of the  
46 GAPDH product obtained from the same sample. (B, E) A negative control (-), without  
47 added template, and a positive control (+), consisting of primers with cDNA template  
48 of an uncloned *T. parva*-specific CD8+ T cell line (641) day 7 after 3<sup>rd</sup> stimulation are  
49 included. The density of the all PCR amplicon bands was measured by Kodak 1D  
50 software (version 3.6). The correlation between variables was analysed by Pearson's  
51 correlation test. P-values < 0.05 were considered significant.

52

53

54

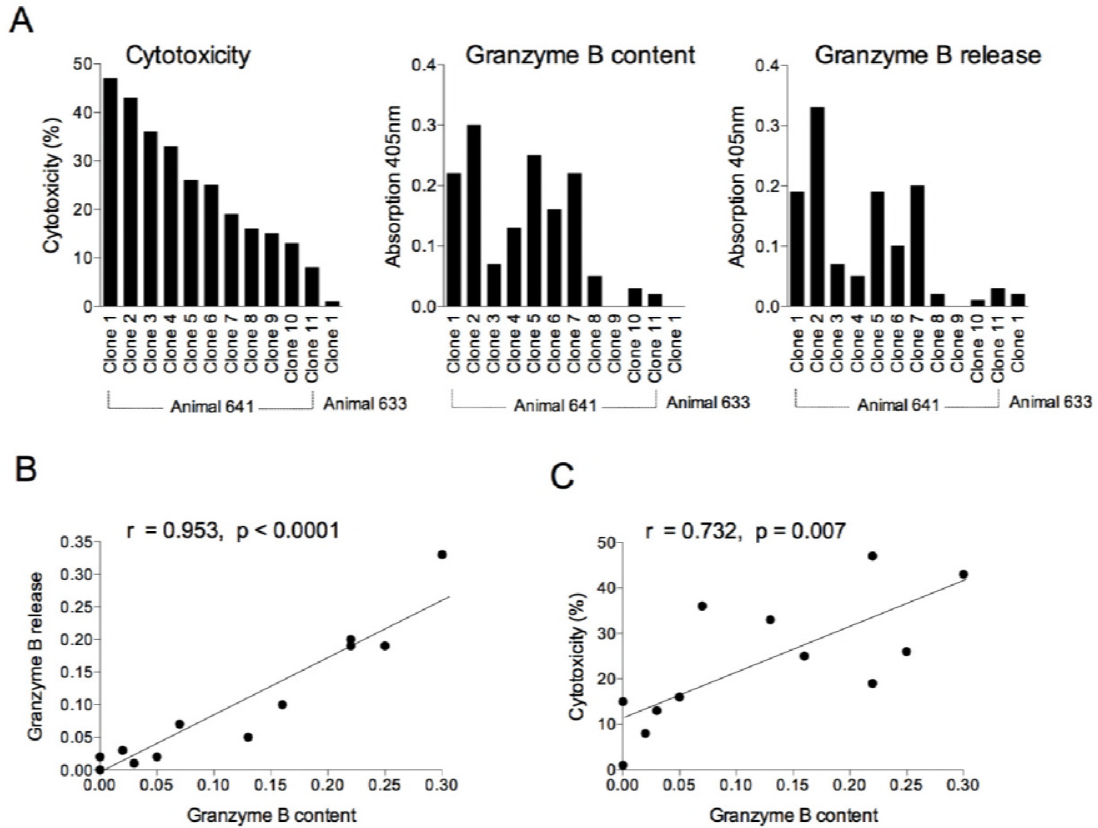

55

56 Figure 3. (A). Cytotoxic activity and levels of granzyme B content and release of 12 *T.*  
 57 *parva*-specific CD8+ T cell clones isolated from two animals (641 and 633) were  
 58 assayed with autologous *T. parva*-infected cell target cells. A standard effector to  
 59 target ratio of 2:1 was used. Correlation of granzyme B cellular activity with (B) levels  
 60 of released granzyme B following antigenic stimulation ( $r = 0.953, p < 0.0001$ ) and, (C)  
 61 levels of killing of *Theileria*-infected target cells by CD8+ T cell clones ( $r = 0.732, p$   
 62  $= 0.007$ ). The correlation between variables was analysed by Pearson's correlation  
 63 test. P-values  $< 0.05$  were considered significant.

64

65

66

67

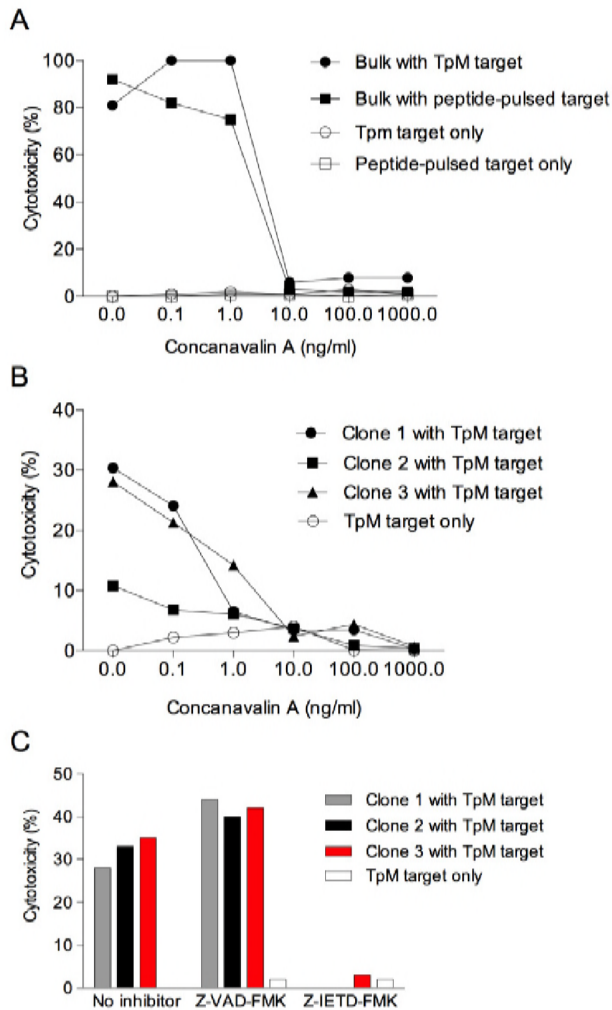

68

69 Figure 4. Inhibition of the cytotoxic activity of (A) an un-cloned ('bulk') CD8+ T cell line  
 70 from animal 011 and (B) three CD8+ T cell lines from animal 592 by incubation with  
 71 the perforin inhibitor concanavalin A (CMA), and (C) three CD8+ T cell lines from  
 72 animal 641 by incubation with the granzyme B inhibitor Z-IETD-FMK. (A, B) Effectors  
 73 ( $1 \times 10^4$ ) were pre-incubated with various concentrations of CMA for 2h and tested in a  
 74 4-h cytotoxicity assay with [ $^{111}\text{In}$ ]-labelled autologous TpM target cells and MHC-  
 75 matched target cells pulsed with Tp<sub>249-59</sub> peptide (1000ng/ml). (C) Three cloned CD8+  
 76 T cell lines ( $1 \times 10^4$ ) were pre-incubated for 1 h with 40uM Z-IETD-FMK and a negative  
 77 control, Z-VAD-FMK. Labelled target cells alone were also incubated with the inhibitors  
 78 in the assay. A standard effector to target ratio of 2:1 was used.

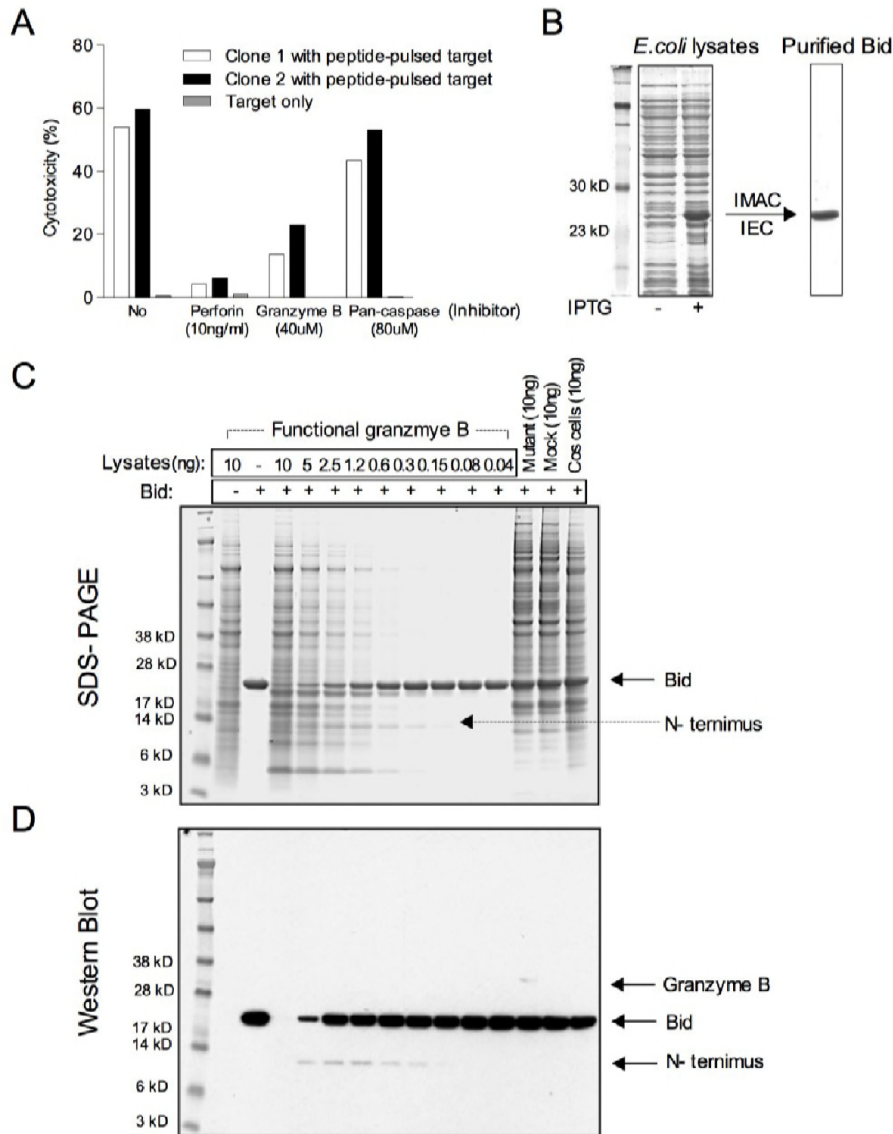

80

81 Figure 5. (A). <sup>111</sup>In-labelled peptide-pulsed target cells (MHC-matched target cells,  
82 5x10<sup>3</sup> + Tp1<sub>214-224</sub>, 100ng/ml) were pre-incubated with the ‘pan-caspase’ inhibitor Z-  
83 VAD-FMK (80uM) for 1h and tested in a 4-hour cytotoxicity assay with two Tp1-specific  
84 cloned CD8+ T cell lines from animal 641. As controls, effector cells (1x10<sup>4</sup>) pre-  
85 incubated with the ‘perforin’ inhibitor CMA (10ng/ml) for 2h or the ‘granzyme B’ inhibitor  
86 Z-IETD-FMK (40uM) for 1h were tested in the same experiment. Labelled target cell  
87 alone were also incubated with these inhibitors in the assay. A standard effector to

88 target ratio of 2:1 was used. (B). Expression vector pET-15b, carrying an N-terminal  
89 His-Tag sequence followed by full-length coding sequence of bovine Bid was  
90 expressed in *E. coli* BL21 (DE3) in the presence (+) or absence (-) of IPTG and the  
91 expressed products were purified using automated immobilised metal affinity  
92 chromatography (IMAC) and automated ion exchange chromatography (IEC).  
93 Products were separated by SDS-PAGE and visualized by Commassie blue staining.  
94 The predicted size of bovine recombinant Bid is 23.7 kD. (C, D) Purified recombinant  
95 bovine Bid proteins (3ug) were incubated with indicated concentrations of active  
96 bovine granzyme B for 2 h at 37°C. The reaction products were separated by SDS-  
97 PAGE and visualized by Commassie blue staining (C) and full-length recombinant Bid  
98 and truncated Bid (N-terminus) were detected by anti-His-Tag antibody and  
99 recombinant granzyme B was detected by anti-FLAG M2 antibody in Western Blot (D).  
100 (C, D) Inactive bovine granzyme B mutant (an alanine substitution at position 195),  
101 mock (pFLAG without an insert) and Cos-7 cells alone were included as negative  
102 controls for granzyme B proteolysis specificity

1 Supplementary 1. Effect of granzyme B inhibitors on granzyme B enzymatic activity in  
2 *T. parva*-specific CD8+ T cell lines

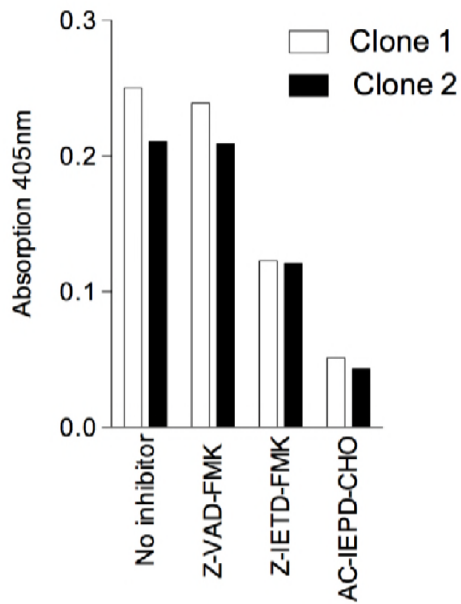

3  
4 Two cloned CD8+ T cell lines ( $1 \times 10^6$  cells) were pre-incubated for 1h with the cell-  
5 permeable granzyme B inhibitor, Z-IETD-FMK (40uM) and a negative control, Z-VAD-  
6 FMK (40uM) and tested in a 4-hour substrate assay. As a positive control, lysates of  
7 CD8+ T cell lines ( $1 \times 10^6$  cells) were also pre-incubated with the non-cell-permeable  
8 granzyme B inhibitor, AC-IEPD-CHO (10uM) and tested in the same substrate assay.

9  
10  
11  
12  
13  
14  
15  
16  
17

18 Supplementary 2. Inhibition of cytolysis of *T.annulata*-infected cells induced by  
19 100uM cisplatin by incubation with Z-VAD-FMK for 24 hour

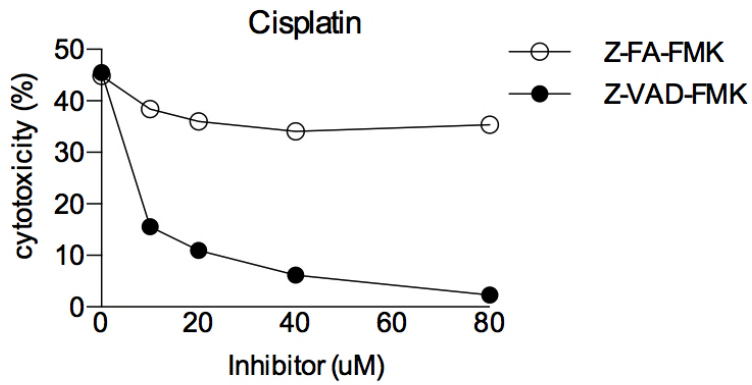

20

21 <sup>111</sup>In-labelled *T. annulata*-infected cells ( $5 \times 10^5$ ) from animal 641 were incubated for  
22 24h with 100uM cisplatin with various concentrations of Z-VAD-FMK and radioactivity  
23 released was measured. A negative control inhibitor, Z-FA-FMK was included.  
24 Labelled target cells incubated with Z-VAD-FMK (80uM) were used to measure  
25 spontaneous radioactivity released.
